# Supplementary material
Source: Royal Society of Chemistry journal article supplement (doi:10.1039/d5gc06471f)
Supplement: d5gc06471f1.xlsx [file d5gc06471f1.xlsx]

## Sheet: Atom Economy
	3a
	MW reagents
		1 (Acetophenone)	120	g/mol
		2a (FA)	96	g/mol
	MW product
			198	g/mol
	Atom Economy
			0.916667
	3b
	MW reagents
		1 (Acetophenone)	120	g/mol
		2b (MF)	110	g/mol
	MW product
			212	g/mol
	Atom Economy
			0.921739
	3c
	MW reagents
		1 (Acetophenone)	120	g/mol
		2c (HMF)	126	g/mol
	MW product
			228	g/mol
	Atom Economy
			0.926829
	3d
	MW reagents
		1 (Acetophenone)	120	g/mol
		2d (Benzaldehyde)	106	g/mol
	MW product
			208	g/mol
	Atom Economy
			0.920354

## Sheet: ME
	Microwave					Conventional
	3a					3a
	Moles of product					Moles of product
			0.51	mmol				0.31	mmol
	Moles of reagents					Moles of reagents
		1 (Acetophenone)	1	mmol			1 (Acetophenone)	1	mmol
		2a (FA)	1	mmol			2a (FA)	1	mmol
	Moles of catalyst					Moles of catalyst
			0.750372	mmol				0.750372	mmol
	ME					ME
			18.5429	%				11.2712	%
		Conversion	51	%			Conversion	31	%
		Selectivity	100	%			Selectivity	100	%
		Yield	51	%			Yield	31	%
	3b					3b
	Moles of product					Moles of product
			0.6237	mmol				0.5	mmol
	Moles of reagents					Moles of reagents
		1 (Acetophenone)	1	mmol			1 (Acetophenone)	1	mmol
		2b (MF)	1	mmol			2b (MF)	1	mmol
	Moles of catalyst					Moles of catalyst
			0.799007	mmol				0.799007	mmol
	ME					ME
			22.2829	%				17.8635	%
		Conversion	63	%			Conversion	50	%
		Selectivity	99	%			Selectivity	100	%
		Yield	62.37	%			Yield	50	%
	3c					3c
	Moles of product					Moles of product
			0.837	mmol				0.8118	mmol
	Moles of reagents					Moles of reagents
		1 (Acetophenone)	1	mmol			1 (Acetophenone)	1	mmol
		2c (HMF)	1	mmol			2c (HMF)	1	mmol
	Moles of catalyst					Moles of catalyst
			0.854591	mmol				0.854591	mmol
	ME					ME
			29.3212	%				28.4384	%
		Conversion	90	%			Conversion	82	%
		Selectivity	93	%			Selectivity	99	%
		Yield	83.7	%			Yield	81.18	%
	3d					3d
	Moles of product					Moles of product
			0.59	mmol				0.7	mmol
	Moles of reagents					Moles of reagents
		1 (Acetophenone)	1	mmol			1 (Acetophenone)	1	mmol
		2d (Benzaldehyde)	1	mmol			2d (Benzaldehyde)	1	mmol
	Moles of catalyst					Moles of catalyst
			0.785112	mmol				0.785112	mmol
	ME					ME
			21.1841	%				25.1336	%
		Conversion	59	%			Conversion	70	%
		Selectivity	100	%			Selectivity	100	%
		Yield	59	%			Yield	70	%

## Sheet: PMI
	Microwave					Conventional
	3a					3a
	Reagents and Catalyst					Reagents and Catalyst
		1 (Acetophenone)	120	mg			1 (Acetophenone)	120	mg
		2a (FA)	96	mg			2a (FA)	96	mg
		MgO	30.24	mg			MgO	30.24	mg
	Product (expected)					Product (expected)
		3a	198	mg			3a	198	mg
	Product (real)					Product (real)
		3a	100.98	mg			3a	61.38	mg
	PMI (expected)					PMI (expected)
			1.24364					1.24364
	PMI (real)					PMI (real)
			2.4385					4.01173
		Conversion	51	%			Conversion	31	%
		Selectivity	100	%			Selectivity	100	%
		Yield	51	%			Yield	31	%
	3b					3b
	Reagents and Catalyst					Reagents and Catalyst
		1 (Acetophenone)	120	mg			1 (Acetophenone)	120	mg
		2b (MF)	110	mg			2b (MF)	110	mg
		MgO	32.2	mg			MgO	32.2	mg
	Product (expected)					Product (expected)
		3a	212	mg			3a	212	mg
	Product (real)					Product (real)
		3a	132.224	mg			3a	106	mg
	PMI (expected)					PMI (expected)
			1.23679					1.23679
	PMI (real)					PMI (real)
			1.98299					2.47358
		Conversion	63	%			Conversion	50	%
		Selectivity	99	%			Selectivity	100	%
		Yield	62.37	%			Yield	50	%
	3c					3c
	Substrate					Substrate
		1 (Acetophenone)	120	mg			1 (Acetophenone)	120	mg
		2c (HMF)	126	mg			2c (HMF)	126	mg
		MgO	34.44	mg			MgO	34.44	mg
	Product (expected)					Product (expected)
		3b	228	mg			3b	228	mg
	Product (real)					Product (real)
		3b	190.836	mg			3b	185.09	mg
	PMI (expected)					PMI (expected)
			1.23					1.23
	PMI (real)					PMI (real)
			1.46953					1.51515
		Conversion	90	%			Conversion	82	%
		Selectivity	93	%			Selectivity	99	%
		Yield	83.7	%			Yield	81.18	%
	3d					3d
	Substrate					Substrate
		1 (Acetophenone)	120	mg			1 (Acetophenone)	120	mg
		2d (Benzaldehyde)	106	mg			2d (Benzaldehyde)	106	mg
		MgO	31.64	mg			MgO	31.64	mg
	Product (expected)					Product (expected)
		3c	208	mg			3c	208	mg
	Product (real)					Product (real)
		3c	122.72	mg			3c	145.6	mg
	PMI (expected)					PMI (expected)
			1.23865					1.23865
	PMI (real)					PMI (real)
			2.09941					1.76951
		Conversion	59	%			Conversion	70	%
		Selectivity	100	%			Selectivity	100	%
		Yield	59	%			Yield	70	%

## Sheet: E-Factor
	Microwave					Conventional
	3a					3a
	Total mass of reagents					Total mass of reagents
		1 (Acetophenone)	120	mg			1 (Acetophenone)	120	mg
		2a (FA)	96	mg			2a (FA)	96	mg
	Waste					Waste
		Humins + H2O + unreacted substrates	115.02	mg			Humins + H2O + unreacted substrates	154.62	mg
	Product MW					Product MW
			198	g/mol				198	g/mol
	Yield					Yield
			51	%				31	%
	Product					Product
			100.98	mg				61.38	mg
	E-Factor					E-Factor
			1.13904					2.51906
	3b					3b
	Total mass of reagents					Total mass of reagents
		1 (Acetophenone)	120	mg			1 (Acetophenone)	120	mg
		2b (MF)	110	mg			2b (MF)	110	mg
	Waste					Waste
		Humins + H2O + unreacted substrates	98.56	mg			Humins + H2O + unreacted substrates	124	mg
	Product MW					Product MW
			212	g/mol				212	g/mol
	Yield					Yield
			62	%				50	%
	Product					Product
			131.44	mg				106	mg
	E-Factor					E-Factor
			0.749848					1.16981
	3c					3c
	Total mass of reagents					Total mass of reagents
		1 (Acetophenone)	120	mg			1 (Acetophenone)	120	mg
		2c (HMF)	126	mg			2c (HMF)	126	mg
	Waste					Waste
		Humins + H2O + unreacted substrates	54.48	mg			Humins + H2O + unreacted substrates	61.32	mg
	Product MW					Product MW
			228	g/mol				228	g/mol
	Yield					Yield
			84	%				81	%
	Product					Product
			191.52	mg				184.68	mg
	E-Factor					E-Factor
			0.284461					0.332034
	3d					3d
	Total mass of reagents					Total mass of reagents
		1 (Acetophenone)	120	mg			1 (Acetophenone)	120	mg
		2d (Benzaldehyde)	106	mg			2d (Benzaldehyde)	106	mg
	Waste					Waste
		Humins + H2O + unreacted substrates	103.28	mg			Humins + H2O + unreacted substrates	80.4	mg
	Product MW					Product MW
			208	g/mol				208	g/mol
	Yield					Yield
			59	%				70	%
	Product					Product
			122.72	mg				145.6	mg
	E-Factor					E-Factor
			0.841591					0.552198
